# Supplementary material for: Persistence and Effect of a Multistrain Starter Culture on Antioxidant and Rheological Properties of Novel Wheat Sourdoughs and Bread
Source: PubMed Central journal article supplement (PMC7555968; doi:10.3390/foods9091258), 2020-09-08
Supplement: foods-09-01258-s001.pdf [file foods-09-01258-s001.pdf]

**Table S1.** DPPH and total phenolic compounds of ten traditional Calabrian sourdoughs and dough produced with baker's yeast.

| Doughs                   | DPPH <sup>a</sup>       | Total phenols <sup>b</sup> |
|--------------------------|-------------------------|----------------------------|
| PF1                      | 20.38±0.12 <sup>e</sup> | 173.41±0.16 <sup>e</sup>   |
| PF2                      | 19.27±0.14 <sup>f</sup> | 97.64±0.05 <sup>i</sup>    |
| PF3                      | 14.54±0.18 <sup>h</sup> | 178.87±0.12 <sup>d</sup>   |
| PF4                      | 21.17±0.19 <sup>d</sup> | 183.66±0.11 <sup>b</sup>   |
| PF5                      | 22.27±0.23 <sup>c</sup> | 95.83±0.06 <sup>l</sup>    |
| PF6                      | 29.60±0.17 <sup>b</sup> | 108.38±0.09 <sup>h</sup>   |
| PF7                      | 21.62±0.12 <sup>d</sup> | 110.35±0.22 <sup>g</sup>   |
| PF8                      | 20.44±0.26 <sup>e</sup> | 179.35±0.32 <sup>c</sup>   |
| PF9                      | 14.14±0.19 <sup>h</sup> | 148.92±0.05 <sup>f</sup>   |
| PF10                     | 35.82±0.25 <sup>a</sup> | 195.62±0.04 <sup>a</sup>   |
| PFC                      | 17.77±0.23 <sup>g</sup> | 71.61±0.10 <sup>m</sup>    |
| Statistical significance | ***                     | ***                        |

<sup>a</sup>% of inhibition

<sup>b</sup>mg of gallic acid/100 g of dough

Means values in a vertical column with different letters were significantly different according to the Tukey's test (\*\*\*, p≤0.001).

**Table S2.** Rheological attributes (a) Stickiness and Hardness and (b) Firmness, Adhesiveness, extensibility of ten traditional Calabrian sourdoughs and dough produced with baker's yeast.

| Dough | Stickiness test            |                          |                                   | Penetration test            |
|-------|----------------------------|--------------------------|-----------------------------------|-----------------------------|
|       | Stickiness (g)             | Work of Adhesion (g.sec) | Dough strength/ Cohesiveness (mm) | Hardness (g)                |
| PF1   | 221.16±53.49 <sup>ab</sup> | 8.82±1.62 <sup>ab</sup>  | 1.26±0.20 <sup>b</sup>            | 22.32±3.58 <sup>d</sup>     |
| PF2   | 142.25±11.37 <sup>bc</sup> | 16.36±1.09 <sup>a</sup>  | 4.50±0.11 <sup>a</sup>            | 67.39±13.26 <sup>cd</sup>   |
| PF3   | 48.38±15.67 <sup>cd</sup>  | 4.74±2.24 <sup>b</sup>   | 2.01±0.87 <sup>ab</sup>           | 103.18±16.46 <sup>bd</sup>  |
| PF4   | 261.76±32.18 <sup>a</sup>  | 15.04±2.75 <sup>a</sup>  | 3.76±0.31 <sup>ab</sup>           | 17.59±5.63 <sup>d</sup>     |
| PF5   | 43.07±7.80 <sup>d</sup>    | 2.28±0.71 <sup>b</sup>   | 1.04±0.23 <sup>b</sup>            | 177.56±24.86 <sup>abc</sup> |
| PF6   | 71.95±7.41 <sup>cd</sup>   | 9.35±1.14 <sup>ab</sup>  | 3.58±0.45 <sup>ab</sup>           | 85.58±10.14 <sup>bd</sup>   |
| PF7   | 47.41±6.27 <sup>cd</sup>   | 2.68±0.87 <sup>b</sup>   | 1.02±0.27 <sup>b</sup>            | 217.74±29.65 <sup>ab</sup>  |
| PF8   | 40.91±7.12 <sup>d</sup>    | 2.12±0.87 <sup>b</sup>   | 0.95±0.36 <sup>b</sup>            | 281.76±75.14 <sup>a</sup>   |
| PF9   | 41.69±9.98 <sup>d</sup>    | 2.69±1.22 <sup>b</sup>   | 1.21±0.47 <sup>b</sup>            | 197.36±27.43 <sup>abc</sup> |
| PF10  | 79.19±8.41 <sup>cd</sup>   | 10.14±4.35 <sup>ab</sup> | 3.79±1.54 <sup>ab</sup>           | 119.26±13.95 <sup>bd</sup>  |
| PFC   | 78.89±16.16 <sup>cd</sup>  | 10.24±1.98 <sup>ab</sup> | 3.71±0.57 <sup>ab</sup>           | 33.66±3.53 <sup>d</sup>     |

(a)

| Dough | Warburtons test         |                              |                          | Kieffer test                    |                            |
|-------|-------------------------|------------------------------|--------------------------|---------------------------------|----------------------------|
|       | Firmness (kg)           | Work of Compression (kg.sec) | Adhesiveness peak (kg)   | Resistance to extensibility (g) | Extensibility (mm)         |
| PF1   | 0.28±0.08 <sup>c</sup>  | 1.45±0.64 <sup>c</sup>       | - 0.25±0.02 <sup>a</sup> | nd*                             | nd*                        |
| PF2   | nd*                     | nd*                          | nd*                      | 24.03±6.57 <sup>ab</sup>        | - 15.26±2.84 <sup>cd</sup> |
| PF3   | 0.72±0.20 <sup>c</sup>  | 4.85±1.57 <sup>c</sup>       | - 1.49±0.28 <sup>a</sup> | 12.96±1.10 <sup>b</sup>         | 11.00±4.13 <sup>ab</sup>   |
| PF4   | nd*                     | nd*                          | nd*                      | nd*                             | nd*                        |
| PF5   | 2.93±0.42 <sup>ac</sup> | 17.92±3.05 <sup>ac</sup>     | - 1.59±0.70 <sup>a</sup> | 43.68±2.56 <sup>a</sup>         | - 16.34±2.08 <sup>d</sup>  |
| PF6   | nd*                     | nd*                          | nd*                      | 30.25±6.43 <sup>ab</sup>        | 15.08±2.96 <sup>ab</sup>   |
| PF7   | 8.62±2.42 <sup>a</sup>  | 52.09±16.31 <sup>a</sup>     | - 1.99±0.79 <sup>a</sup> | 32.85±7.43 <sup>ab</sup>        | 12.56±1.50 <sup>ab</sup>   |
| PF8   | 7.04±1.78 <sup>ac</sup> | 41.44±5.83 <sup>ac</sup>     | - 1.38±0.19 <sup>a</sup> | 32.54±8.07 <sup>ab</sup>        | 11.54±1.12 <sup>ab</sup>   |
| PF9   | 7.66±2.91 <sup>ab</sup> | 47.82±17.19 <sup>ab</sup>    | - 1.7±0.48 <sup>a</sup>  | 44.84±6.58 <sup>a</sup>         | 16.76±4.23 <sup>a</sup>    |
| PF10  | 1.28±0.31 <sup>bc</sup> | 7.98±1.82 <sup>bc</sup>      | - 1.43±0.26 <sup>a</sup> | 12.93±4.73 <sup>b</sup>         | - 0.02±0.00 <sup>bc</sup>  |
| PFC   | 0.65±0.43 <sup>c</sup>  | 2.70±1.02 <sup>c</sup>       | - 0.28±0.06 <sup>a</sup> | 13.91±2.67 <sup>b</sup>         | - 12.20±7.53 <sup>cd</sup> |

\*nd: not determined

(b)
